# Supplementary material
Source: publisher figshare collection journal article supplement (https://scielo.figshare.com/articles/dataset/_/5695948)
Supplement: Supplementary file 1 [file Table_1.xls]

## Sheet: Table_1
<b>Species</b>	<b>Number</b>	<b>(%)</b>
<em>Anopheles (Kerteszia) cruzii</em>	1044	73.8
<em>A. (Nyssorhynchus) strodei</em>	103	7.3
<em>A. (N.) triannulatus</em>	84	6.0
<em>A. (N.) evansae</em>	52	3.7
<em>A. (K.) homunculus</em>	39	2.7
<em>A. (N.) galvaoi</em>	29	2.0
<em>A. (N.) albitarsis</em>	17	1.2
<em>A. (N.) parvus</em>	07	0.5
<em>A. (A.) mediopunctatus</em>	05	0.4
<em>A. (N.) rangeli</em>	03	0.2
<em>A. (N.) lanei</em>	01	0.1
TOTAL	1414	100
