# Supplementary material
Source: publisher figshare collection journal article supplement (https://scielo.figshare.com/articles/dataset/_/5695948)
Supplement: Supplementary file 2 [file Table_2.xls]

## Sheet: Table_2
<b>Sample</b>	<b>Species</b>	<b>Trap</b>	<b>Date</b>
260<em>a</em><a href="#TFN1">*</a>	<em>A. (Nyssorhynchus) lutzii</em>	Shannon	September 2014
279	<em>A. (Kerteszia) cruzii</em>	CDC canopy	August 2014
343	<em>A. (K.) cruzii</em>	CDC canopy	August 2014
479	<em>A. (K.) cruzii</em>	CDC canopy	October 2014
485	<em>A. (K.) cruzii</em>	CDC canopy	October 2014
494<em>a</em><a href="#TFN1">*</a>	<em>A. (N.) evansae</em>	Shannon	October 2014
632	<em>A. (K.) cruzii</em>	CDC ground	November 2014
633	<em>A. (K.) cruzii</em>	CDC canopy	November 2014
868	<em>A. (K.) cruzii</em>	CDC canopy	February 2015
1142	<em>A. (K.) cruzii</em>	CDC canopy	April 2015
1144	<em>A. (K.) cruzii</em>	CDC canopy	April 2015
1248	<em>A. (K.) cruzii</em>	CDC canopy	April 2015
1294<em>a</em><a href="#TFN1">*</a>	<em>A. (N.) strodei</em>	CDC near dwellings	May 2015
